# Supplementary material
Source: PubMed Central journal article supplement (PMC4594666)
Supplement: pro0024-1671-sd3.pdf [file pro0024-1671-sd3.pdf]

**Supplemental Material:****Transient sampling of aggregation-prone conformations causes pathogenic instability of a parkinsonian mutant of DJ-1 at physiological temperature**

Nicole M. Milkovic, Jonathan Catazaro, Jiusheng Lin, Steven Halouska, James L. Kizziah, Sara Basiaga, Ronald L. Cerny, Robert Powers, and Mark A. Wilson

**Figure S1**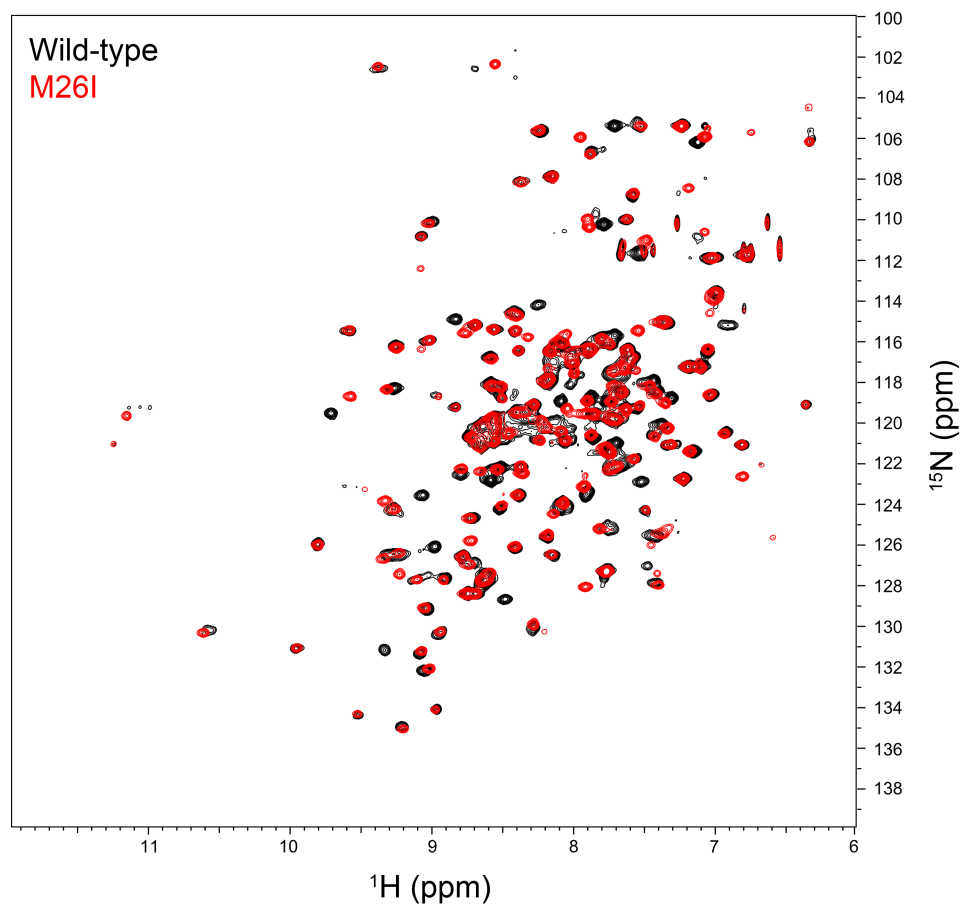

**Fig. S1: Wild-type and M26I DJ-1 have similar 2D  $^1\text{H}$ - $^{15}\text{N}$  HSQCs at 35°C.** The 2D  $^1\text{H}$ - $^{15}\text{N}$  HSQC spectrum for wild-type (WT, black) is overlaid with the spectrum for M26I DJ-1 (red). M26I DJ-1 resonances mostly overlap with those observed for WT DJ-1, as was previously shown by Malgieri and Eliezer [17].

Figure S2

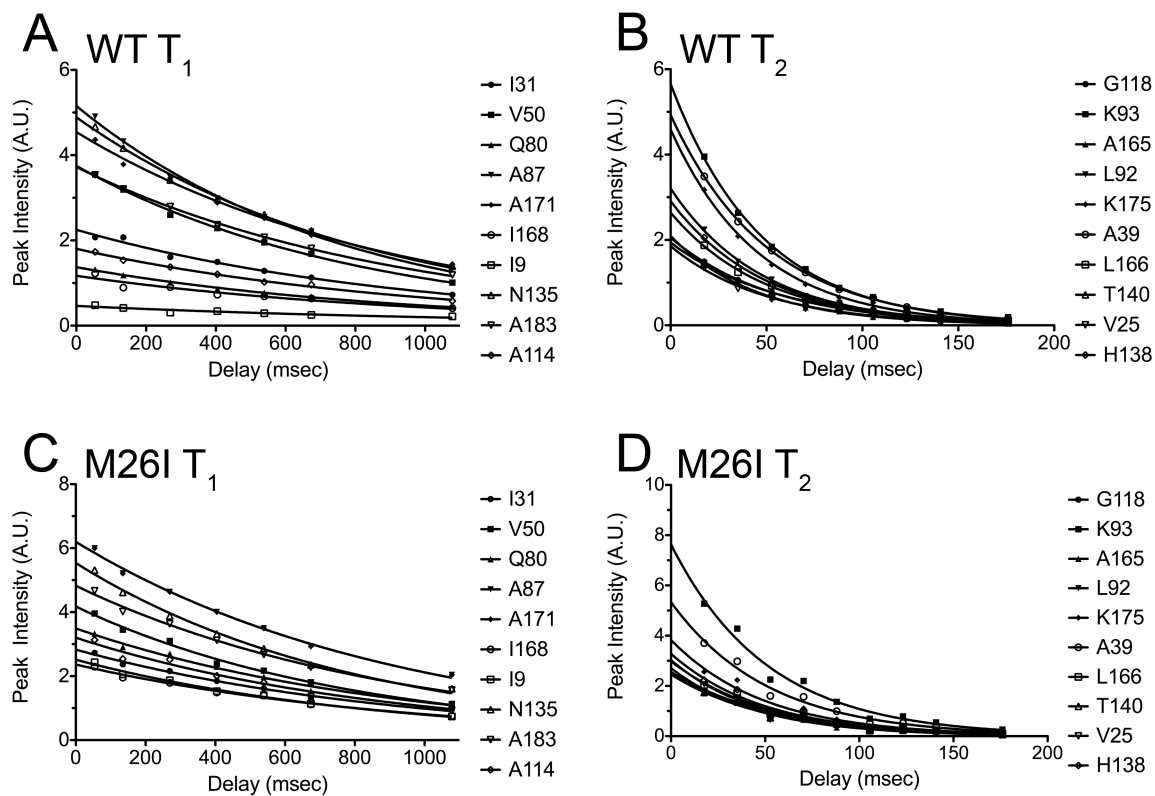

**Fig. S2:  $T_1$ ,  $T_2$  relaxation curves of select residues in wild-type and M26I DJ-1 at 35°C.**

**A, C:** Wild-type (WT) and M26I  $T_1$  relaxation fits for ten randomly chosen amino acids. **B, D:** WT and M26I  $T_2$  relaxation fits for the same amino acids as in **A**. All data were fitted to EQ. 1 in 'Materials and Methods'.

**Table S1****ModelFree Parameters for Wild-type and M26I DJ-1**

|                                | <b>Wild-type DJ-1</b> | <b>M26I DJ-1</b> |
|--------------------------------|-----------------------|------------------|
| <b>Model Free Input</b>        |                       |                  |
| NOE <sup>1</sup>               | 0.779 ± 0.0997        | 0.770 ± 0.0871   |
| R <sub>1</sub>                 | 1.158 ± 0.1398        | 1.219 ± 0.288    |
| R <sub>2</sub>                 | 19.303 ± 2.309        | 18.821 ± 1.727   |
| R <sub>2</sub> /R <sub>1</sub> | 16.877 ± 2.643        | 15.911 ± 2.271   |
| <b>Model Free Output</b>       |                       |                  |
| S <sup>2</sup>                 | 0.912 ± 0.0788        | 0.934 ± 0.0544   |
| S <sup>2</sup> <sub>f</sub>    | 0.876 ± 0.0492        | ---              |
| S <sup>2</sup> <sub>s</sub>    | 0.916 ± 0.0724        | 0.934 ± 0.0544   |
| t <sub>e</sub>                 | 1313.9 ± 714.923      | 622.75 ± 656.975 |
| R <sub>ex</sub> <sup>2</sup>   | 3.188 ± 1.688         | 1.356 ± 1.917    |
| SSE                            | 1.977 ± 2.742         | 1.545 ± 2.238    |

Values in the table are averages ± SD

<sup>1</sup>The NOE values are reported after the removal of NOE values > 1, which include residues:

**WT:** 27 (1.00±0.196), 80 (1.20±0.34), 112 (1.04±0.78), 156 (1.06±0.60), 157 (1.04±0.49),  
and 168 (1.10±0.36)

**M26I:** 15 (1.06±0.21), 133 (1.64±0.12), 161 (1.62±0.11), 169 (1.62±0.11), 186 (1.64±0.16)

<sup>2</sup>The R<sub>ex</sub> values reported may include values of zero in the average and standard deviations

Figure S3

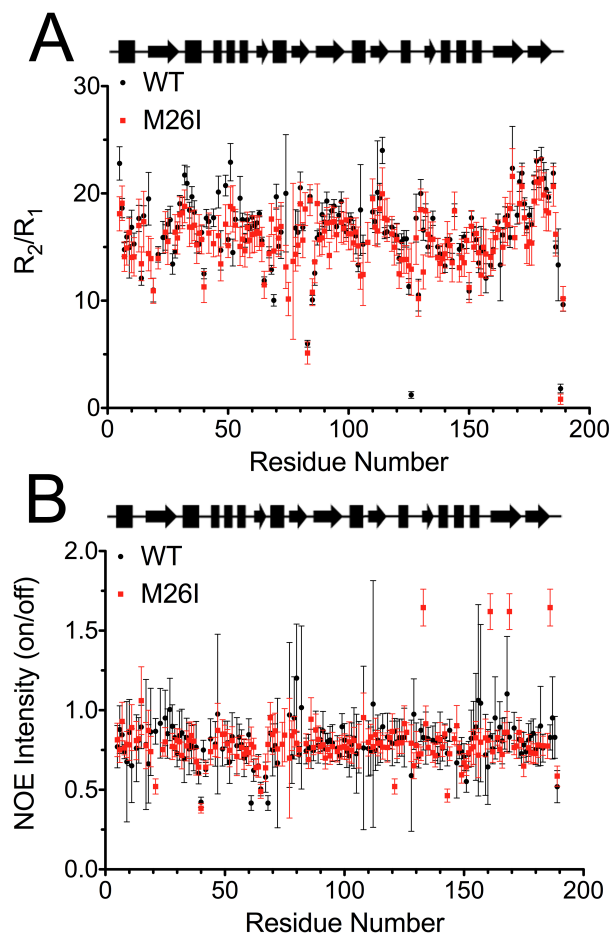

**Fig. S3: The  $R_2/R_1$  and heteronuclear NOE ratios are similar for WT and M26I DJ-1 at 35°C.** **A:** The ratio of relaxation rates ( $R_2/R_1$ ) is plotted for every observed backbone amide resonance in both wild-type (WT, black) and M26I (red) DJ-1. The  $R_2/R_1$  ratio is similar for both proteins at 35°C. **B:** WT (black) and M26I (red) heteronuclear NOE intensity ratios (see EQ. 2 in 'Materials and Methods') are plotted. Four heteronuclear NOE ratios for M26I DJ-1 are not bound by 0 and 1; Met133, Ser161, Val169, and Val186. This is likely due to inadequate equilibration of NOE saturation for these few residues and they were omitted from the fitting.

**Table S2****S<sup>2</sup> Values for Assigned Residues in Wild-type and M26I DJ-1**

See attached Excel File: "TableS2\_S2\_WT\_M26I.xlsx"

Figure S4

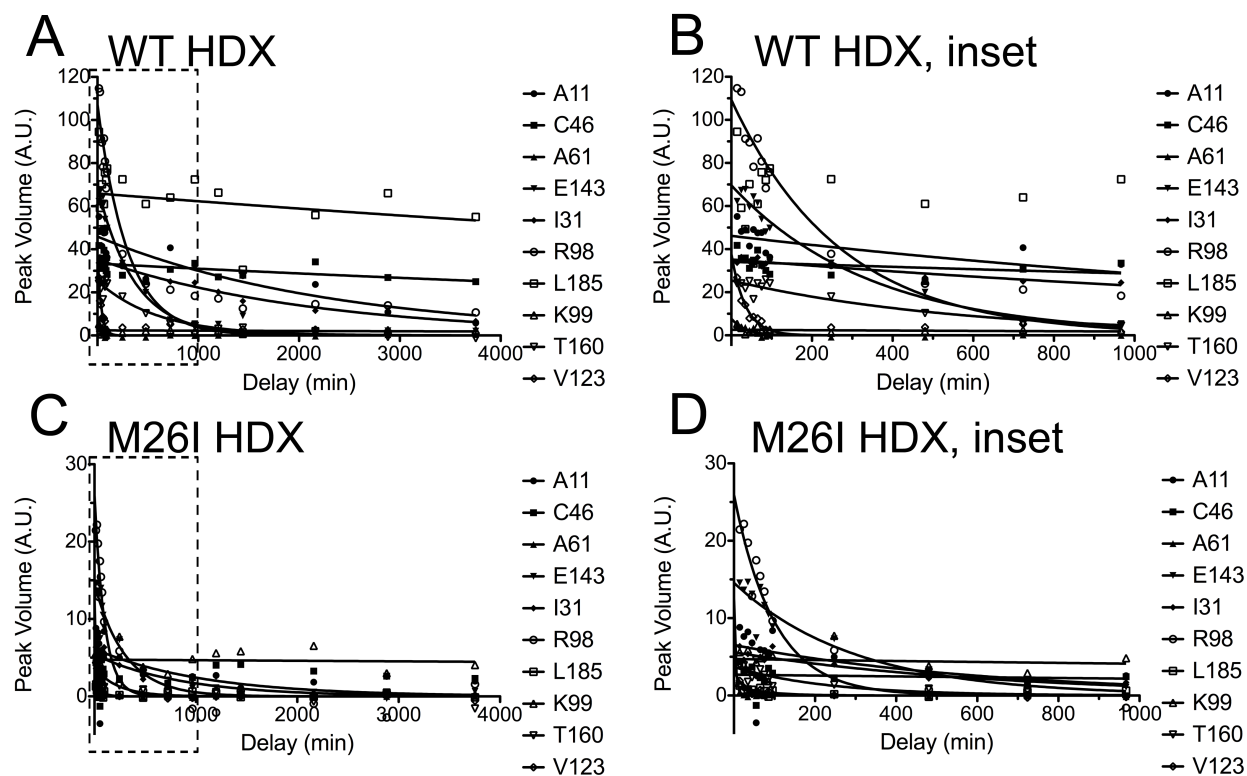

**Fig. S4: HDX curves of select residues in WT and M26I DJ-1.** **A, C:** Fitted decay curves for ten amino acids in wild-type (WT) and M26I DJ-1 HDX, spanning a range of different  $\log_{10}$ PF values. **B, D:** Expanded view of the boxed region in **A** and **C**, respectively. For WT HDX, Leu185 (open squares) data could not be adequately fitted to an exponential decay function due to lack of exchange with  $D_2O$  on this time scale (compare L185 in **A, B**). This was uncommon in the dataset and is shown to represent the full range of data quality obtained. All data were fitted to EQ. 1 in 'Materials and Methods'.

**Table S3****Log<sub>10</sub>PF Values for Assigned Residues in Wild-type and M26I DJ-1**

See attached Excel File: "TableS3\_WT\_M26I\_ProtFactCalc.xlsx"

Figure S5

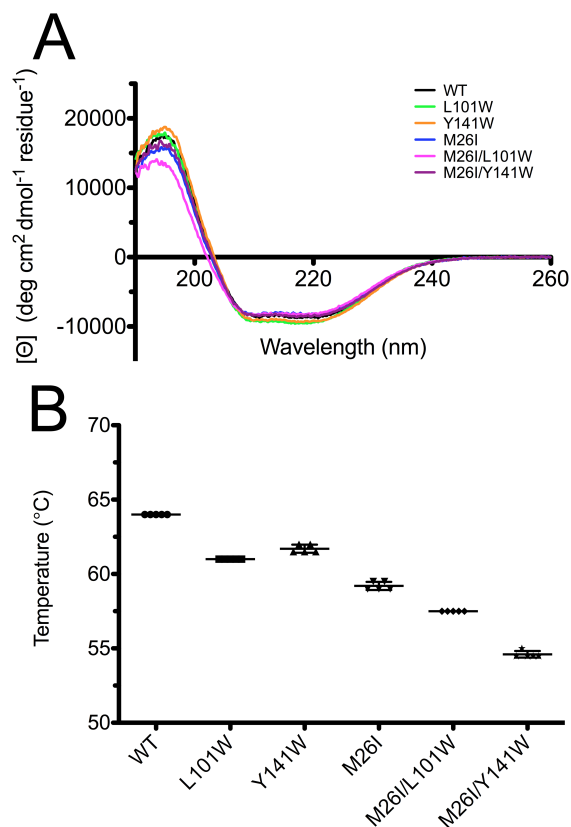

**Fig. S5: Tryptophan mutations have modest effects on thermal stability and secondary structure of DJ-1 at 37°C.** **A:** Circular dichroism (CD) spectra were collected at 37°C for wild-type (WT) (black), M26I (blue), L101W (green), M26I/L101W (magenta), Y141W (orange), and M26I/Y141W DJ-1 (purple). These proteins show no significant differences in the mean residue molar ellipticity ( $[\Theta]$ ) as a function of wavelength, indicating that the Trp mutations are not highly disruptive to DJ-1 structure. **B:** Thermal stability for all proteins in **A** was measured using the thermofluor assay in five separate experiments per sample. Consistent with the CD spectroscopy data (**A**), only small changes are observed. Mean melting temperatures ( $T_m$ , °C) are as follows: WT (64.0), L101W (61.0), Y141W (61.7±0.3), M26I (59.2±0.3), M26I/L101W (57.5), and M26I/Y141W (54.6±0.2).



Figure S6

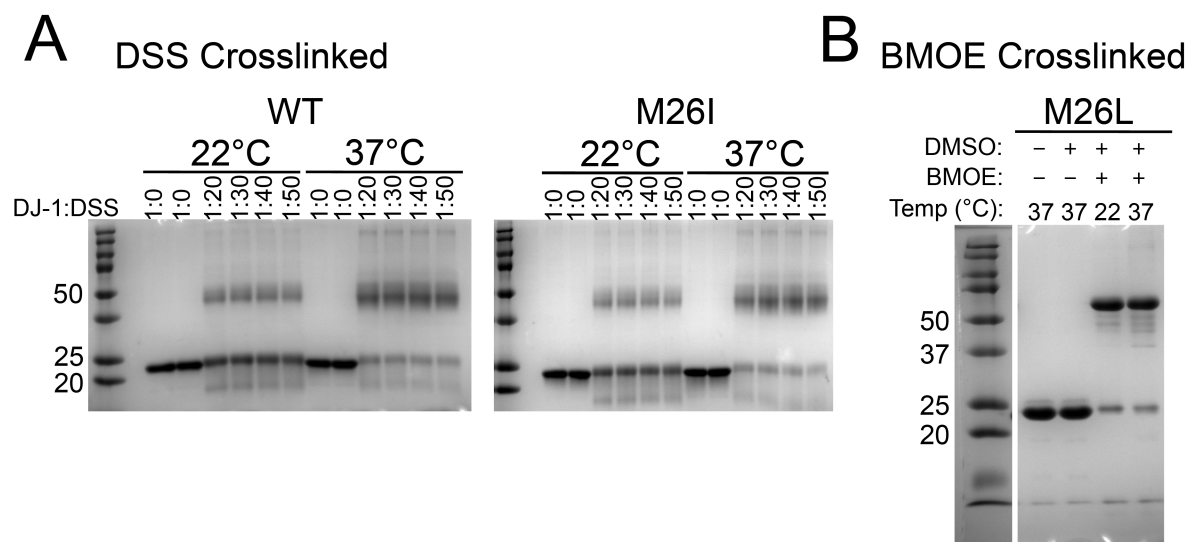

**Fig. S6: Cross-linking behavior of DJ-1 proteins.** **A:** Primary amine cross-linking with DSS for wild-type (WT, left) and M26I (right) DJ-1 resolved by SDS-PAGE. Cross-linking was performed at 1:20, 1:30, 1:40, and 1:50 (DJ-1:DSS) at both 22 and 37°C. Samples in lanes 1 and 2 for both gels are the input and protein + DMSO controls. There is no difference in DSS cross-linking between WT and M26I DJ-1 at either temperature. **B:** BMOE cross-linking for M26L DJ-1 is similar to that of wild-type DJ-1 (see Fig. 4A), consistent with this mutation being non-disruptive.
